# Supplementary material
Source: HighWire-hosted journal article supplement (https://heart.bmj.com/content/106/4/261)
Supplement: inline-supplementary-material-1 [file inline-supplementary-material-1.pdf]

U-Prevent+ Elderly risk score

**Personal Risk Profile**

Gender:  Male  Female

Age:

Geographic region:  United Kingdom  Europe  Other

Current smoking  
 Diabetes mellitus  
 Coronary artery disease  
 Cerebrovascular disease  
 Peripheral artery disease

Total number of medications:

Use the population mean. [Refer to FAQ](#) for further explanation.

Next Previous Next

Systolic blood pressure:

HDL-cholesterol:

LDL-cholesterol:

eGFR:

Use the population mean. [Refer to FAQ](#) for further explanation.

Previous Calculate

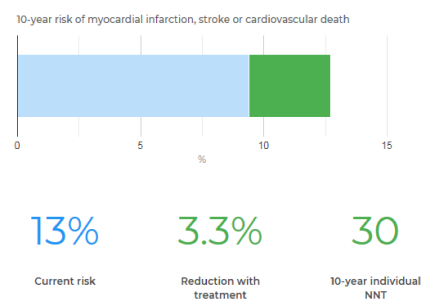

13% Current risk

3.3% Reduction with treatment

30 10-year individual NNT

Copy to clipboard Print results

Intended Treatment

Systolic blood pressure:

LDL cholesterol  $\leq 2.5$  mmol/L

Antithrombotic treatment

Show profile
